# Supplementary material for: Clinical and Laboratory Manifestation of Gastrointestinal Involvement in MIS-C: A Single-Center Observational Study
Source: MDPI journal article supplement (doi:10.3390/gastroent14020017), 2023-06-16
Supplement: s1 [file s1]

**Table S1.** Baseline demographic characteristics and laboratory data – subgroup abdominal and without abdominal pain.

| Laboratory test                                          | Abdominal pain group N=44                          |            | Without abdominal pain N=7 | p     |
|----------------------------------------------------------|----------------------------------------------------|------------|----------------------------|-------|
|                                                          | Mean $\pm$ SD and/or number of patients tested (%) |            |                            |       |
| Mean age                                                 | 9.08 $\pm$ 3.96 (44)                               |            | 7.14 $\pm$ 4.3 (7)         | n.s.# |
| Number of male patients                                  | 31 (70.5%)                                         |            | 6 (85.7%)                  |       |
| Positive epidemiology history – (contact with Covid-19)* | 13 (29.5%)                                         |            | 2 (28.6%)                  |       |
| Positive history of COVID-19 symptoms*                   | 19 (43.2%)                                         |            | 2 (28.6%)                  |       |
| Comorbidities                                            | 14 (31.8%)                                         |            | 0 (0%)                     |       |
| Digestive symptoms                                       | Vomiting                                           | 24 (54.5%) | 2 (28.6%)                  |       |
|                                                          | Diarrhea                                           | 22 (50%)   | 1 (14.3%)                  |       |
|                                                          | Any                                                | 35 (79.5%) | 2 (28.6%)                  |       |
| Absolute leucocytes count                                | 12.86 $\pm$ 6.90 (44)                              |            | 15.2 $\pm$ 6.60 (7)        |       |
| Absolute lymphocyte count                                | 1.37 $\pm$ 1.03 (44)                               |            | 2.03 $\pm$ 2.01 (7)        |       |
| Absolute neutrophil count                                | 10.53 $\pm$ 5.72 (44)                              |            | 12.57 $\pm$ 7.03 (7)       |       |
| Neutrophile percentage                                   | 82.96 $\pm$ 8.00 (43)                              |            | 80.28 $\pm$ 15.81 (7)      |       |
| Platelet count                                           | 257.32 $\pm$ 154.43 (43)                           |            | 277.50 $\pm$ 157.33 (6)    |       |
| CRP initial, mg/dl                                       | 20.26 $\pm$ 12.85 (44)                             |            | 17.73 $\pm$ 12.41 (7)      |       |
| CRP follow-up, mg/dl                                     | 12.36 $\pm$ 7.86 (43)                              |            | 8.16 $\pm$ 5.80 (7)        |       |
| PCT, ng/mL                                               | 8.07 $\pm$ 12.46 (43)                              |            | 10.70 $\pm$ 16.49 (8)      |       |
| Ferritin, ng/mL                                          | 568.43 $\pm$ 378.28 (30)                           |            | 387.43 $\pm$ 283.29 (3)    |       |
| IL-6, ng/mL                                              | 111.94 $\pm$ 119.58 (28)                           |            | 156.57 $\pm$ 260.88 (4)    |       |
| D-dimer, ng/mL                                           | 2402.66 $\pm$ 2050.46 (37)                         |            | 1199.83 $\pm$ 758.66 (6)   |       |
| Fibrinogen, g/L                                          | 5.21 $\pm$ 1.71 (44)                               |            | 5.70 $\pm$ 1.09 (5)        |       |
| ASAT IU/ml                                               | 91.27 $\pm$ 185.36 (39)                            |            | 76.43 $\pm$ 88.39 (7)      |       |
| ALAT IU/ml                                               | 70.68 $\pm$ 106.47 (39)                            |            | 47.29 $\pm$ 46.41 (7)      |       |
| GGT IU/ml                                                | 68.46 $\pm$ 84.70 (35)                             |            | 56.00 $\pm$ 62.34 (2)      |       |
| ALP IU/ml                                                | 131.69 $\pm$ 59.23 (29)                            |            | 139.00 $\pm$ 38.18 (2)     |       |
| LDH, U/L                                                 | 370.03 $\pm$ 198.10 (39)                           |            | 290.33 $\pm$ 54.70 (6)     |       |
| Total bilirubin, umol/L                                  | 17.96 $\pm$ 22.98 (38)                             |            | 9.00 $\pm$ 3.30 (3)        |       |
| Direct bilirubin, umol/L                                 | 8.43 $\pm$ 15.34 (38)                              |            | 3.17 $\pm$ 2.27 (3)        |       |
| Total protein, g/L                                       | 60.62 $\pm$ 10.32 (42)                             |            | 60.71 $\pm$ 7.34 (7)       |       |
| Albumin, g/L                                             | 34.15 $\pm$ 7.37 (43)                              |            | 32.33 $\pm$ 7.45 (6)       |       |
| Amylase, U/L                                             | 45.74 $\pm$ 25.28 (21)                             |            | 93.00 (1)                  |       |
| Lipase, U/L                                              | 65.45 $\pm$ 98.74 (12)                             |            | N/A                        |       |
| US mesenteric lymphadenitis                              | 19 (42)                                            |            | 3 (5)                      |       |
| US Ascites                                               | 31 (42)                                            |            | 1 (5)                      |       |
| US Gallbladder                                           | 5 (44)                                             |            | 0 (5)                      |       |

\* at the past two months prior to the admission; p-value between two groups – with and without abdominal pain ( $p=1.0105 \cdot 10^{-12}$ ) # These differences are not statistically significant, but some could become significant with expanding dataset, for example (CRP-2 and D-dimer). SD- stadard dviation, CRP – C-ractive protin, PCT – procalcitonine, IL-6 – interleucin 6, ASAT – Aspartate aminotransferase, ALAT - alanine transaminase, LDH - Lactate Dehydrogenase, US – ultrasound

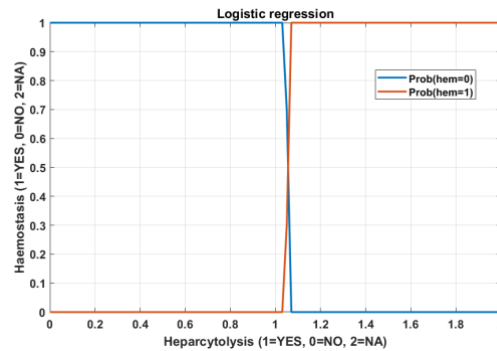

**Figure S1.** Logistic regression for the dependence of hemostasis on hepatocytolysis

hep ==1 – hepatocytolysis, hem=1 – impaired haemostasis, hep=0, no hepar... hem = 0 – no hemo

$$\ln \left( \frac{P\{hem \leq 0\}}{P\{hem > 0\}} \right) = 705.9451 - 671.2114 \cdot hep$$

The P-value for free term 705.9451 was  $p=0.909 \cdot 10^{-33}$ , P-value for coefficient 671.2114 was  $p=0.22 \cdot 10^{-52}$ .
